# Supplementary material for: Palladium nanoparticles immobilized on halloysite nanotubes covered by a multilayer network for catalytic applications
Source: Royal Society of Chemistry journal article supplement (doi:10.1039/c8nj02932f), 2018-01-01

## **Palladium nanoparticles immobilized on halloysite nanotubes covered by multilayer network for catalytic applications**

M. Massaro,<sup>a,\*</sup> C.G. Colletti,<sup>a</sup> G. Buscemi,<sup>a</sup> S. Cataldo,<sup>b</sup> S. Guernelli,<sup>c</sup> G. Lazzara,<sup>b</sup> L.F. Liotta,<sup>d</sup> F. Parisi,<sup>b</sup> A. Pettignano,<sup>b</sup> and S. Riela<sup>a,\*</sup>

<sup>a</sup>Dipartimento STEBICEF, Sez. Chimica, Università degli Studi di Palermo, Viale delle Scienze, Ed. 17, 90128 Palermo, Italy. E-mails: [marina.massaro@unipa.it](mailto:marina.massaro@unipa.it); [serena.riela@unipa.it](mailto:serena.riela@unipa.it).

<sup>b</sup>Dipartimento di Fisica e Chimica, Università degli Studi di Palermo, Viale delle Scienze, Ed. 17, 90128 Palermo, Italy.

<sup>c</sup>Dipartimento di Chimica “Giacomo Ciamician”, University of Bologna, Via S. Giacomo 11, 40126 Bologna, Italy.

<sup>d</sup>Istituto per lo Studio dei Materiali Nanostrutturati ISMN-CNR, Via Ugo La Malfa 153, 90146 Palermo, Italy.

Total pag. 12

Total number of Figures: 16

Total number of Table: 1

## Content

1. Recycling tests of HNT@Pd catalyst in the Suzuki and Heck cross coupling reactions.....S3
2. Heck reactions catalyzed by HNT@Pd catalyst in ethanol.....S4
3. <sup>1</sup>H NMR spectra of pure known compounds of Heck and Suzuki reactions.....S5

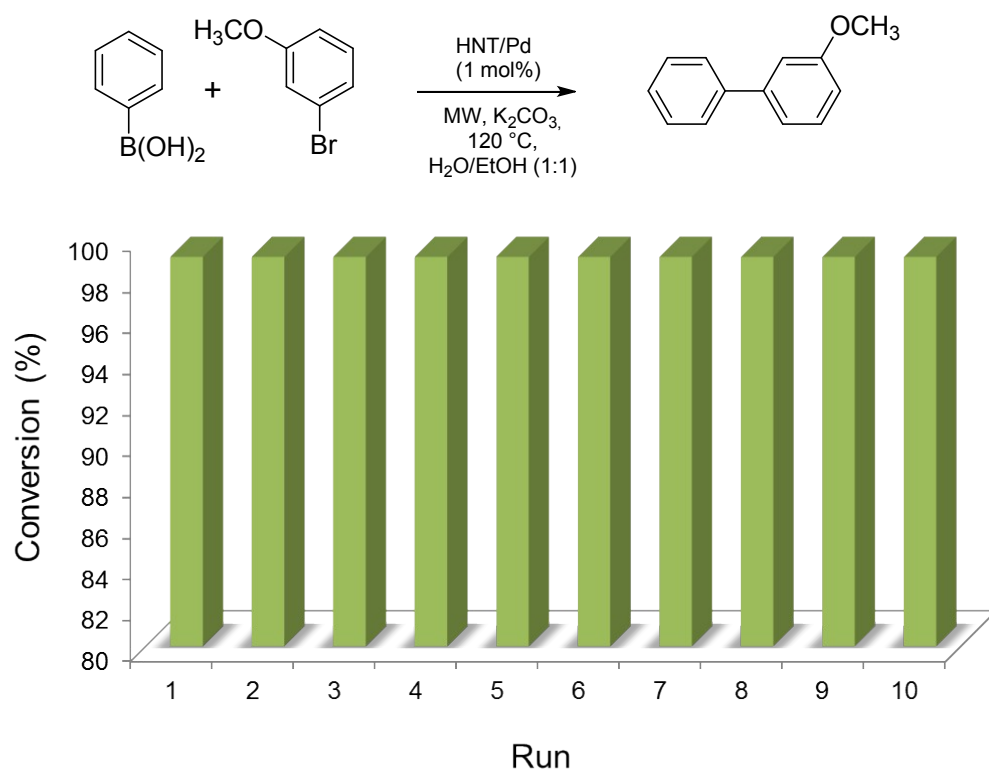

**Figure S1.** Recycling tests of HNT/Pd catalyst in the Suzuki reaction.

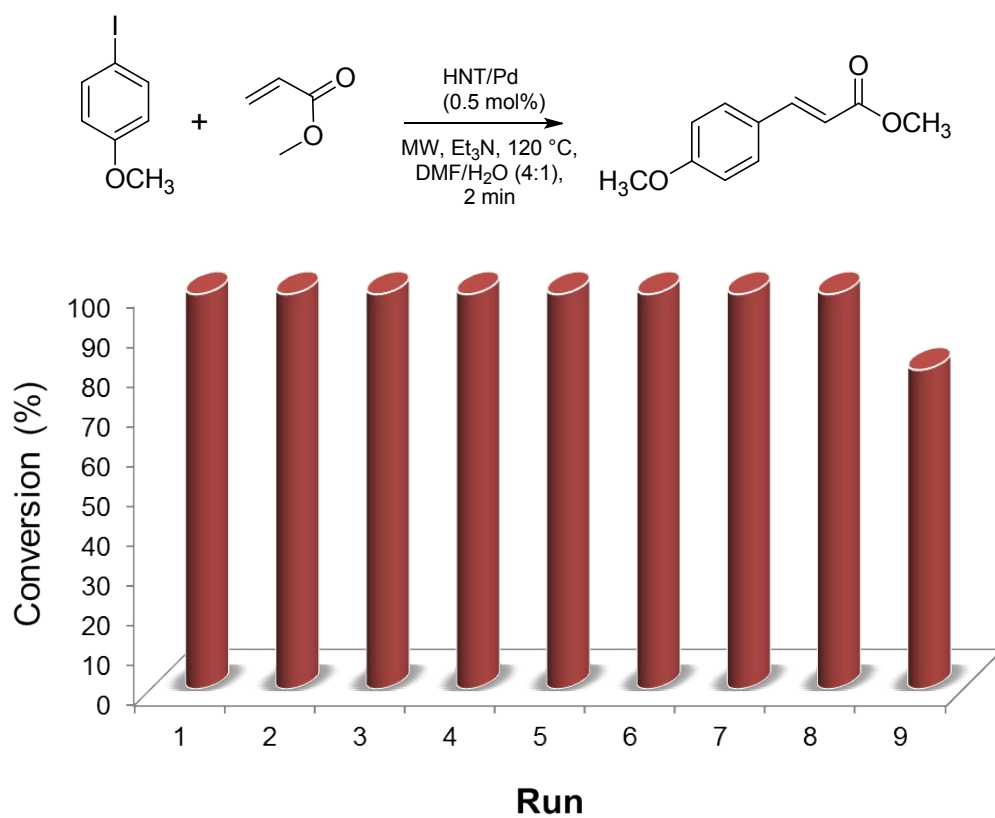

**Figure S2.** Recycling tests of HNT/Pd catalyst in the Suzuki reaction.

**Table S1.** Heck reactions catalyzed by HNT@Pd catalyst in ethanol.<sup>a</sup>

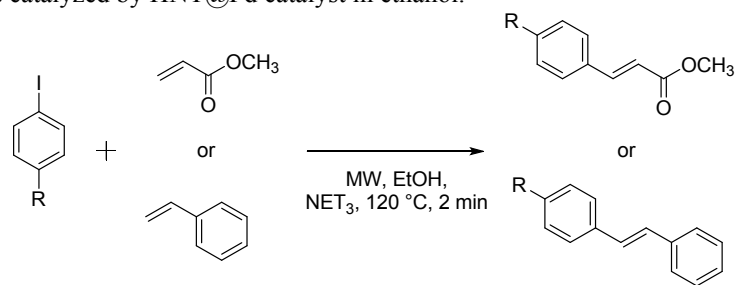

| Entry | Product | Conversion (%) <sup>b</sup> |
|-------|---------|-----------------------------|
| 1     |         | 86                          |
| 2     |         | 24                          |
| 3     |         | 93                          |
| 4     |         | >99                         |
| 5     |         | 42                          |
| 6     |         | trace                       |
| 7     |         | 24                          |
| 8     |         | 12                          |

<sup>a</sup>Reaction conditions: aryl iodide (0.5 mmol), alkene (0.75 mmol), TEA (1 mmol), EtOH (1 mL) and catalyst (0.1 mol%). <sup>b</sup>Determined by <sup>1</sup>H-NMR.

# <sup>1</sup>H NMR spectra of pure known compounds of Heck and Suzuki reactions:

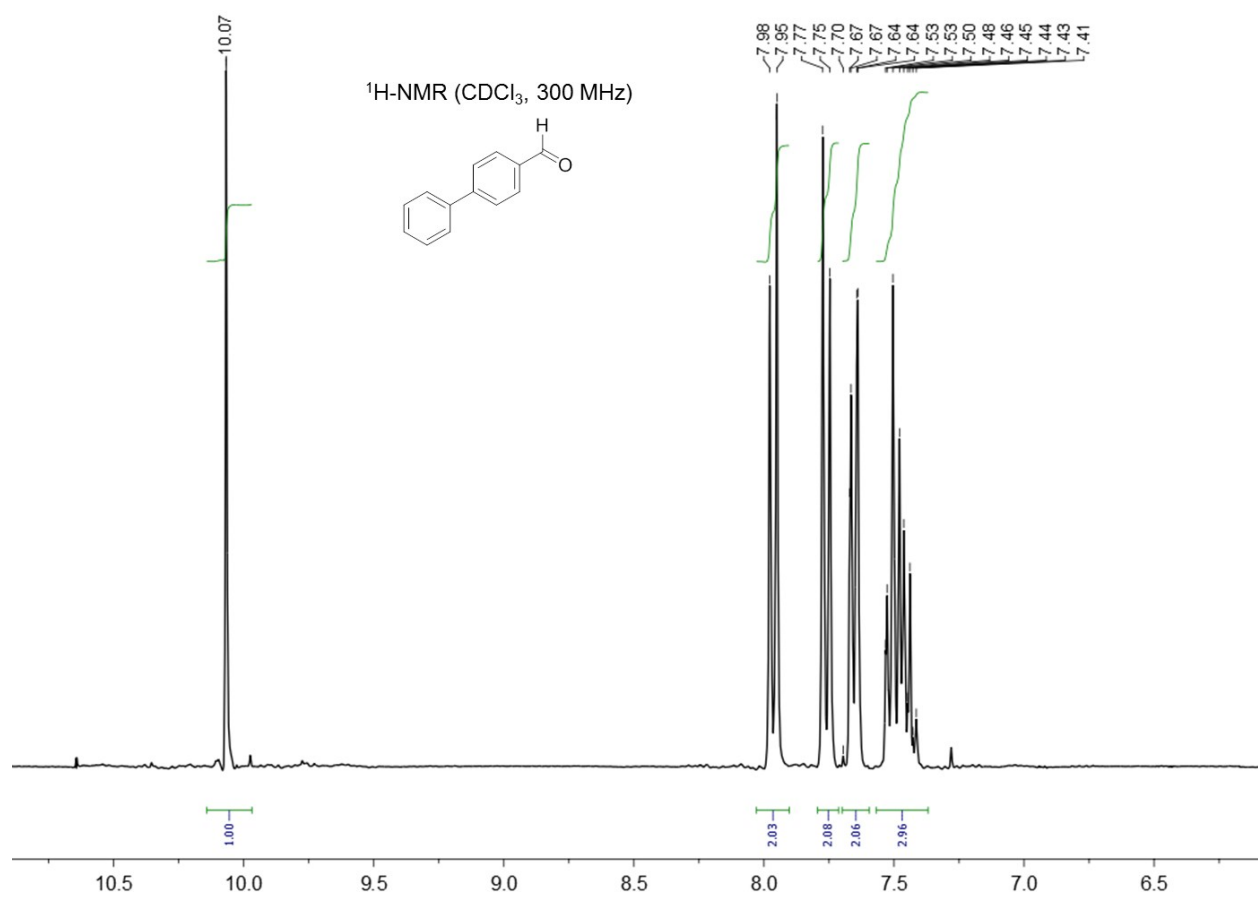

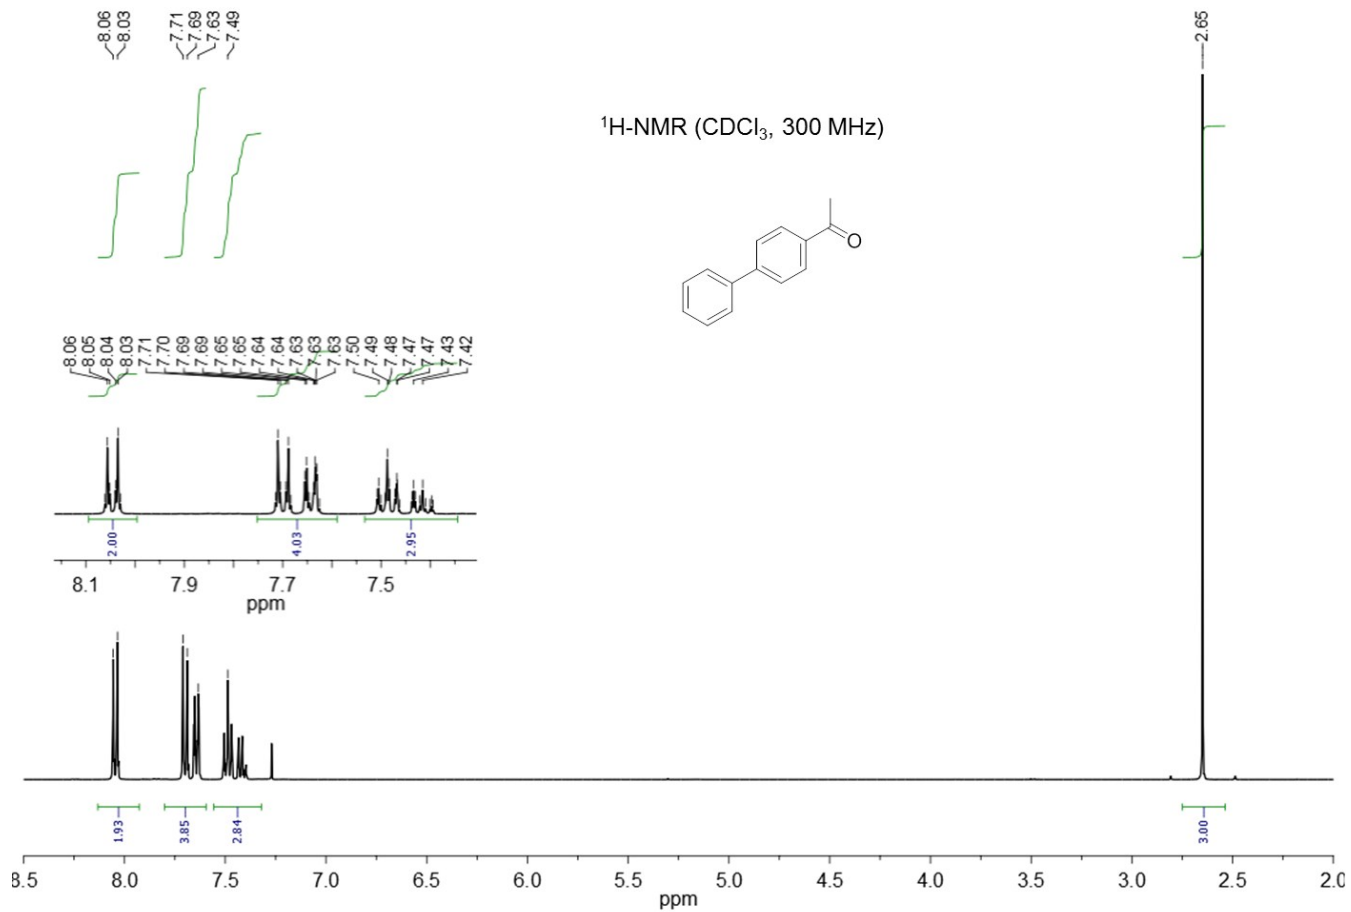

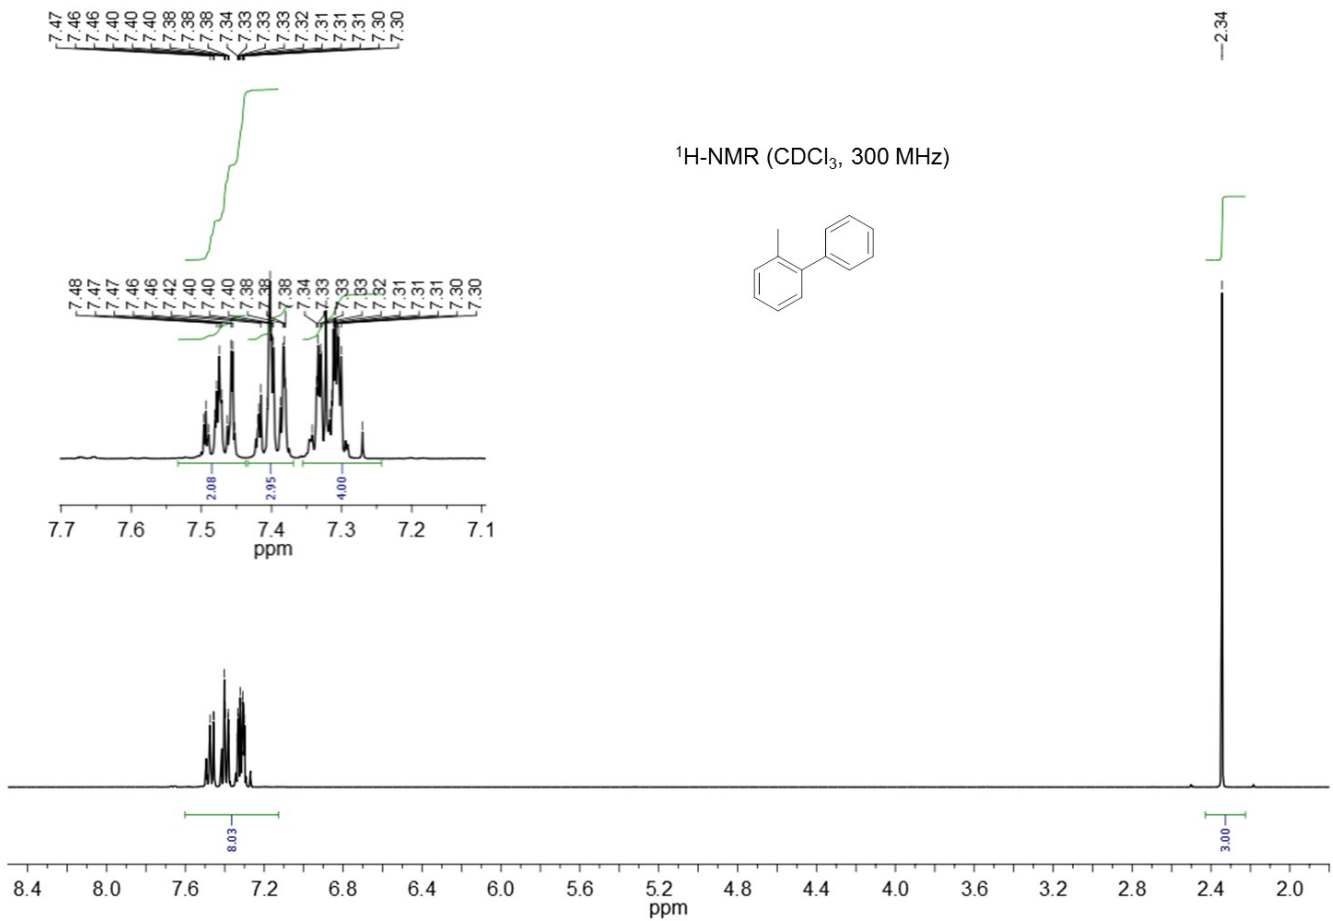

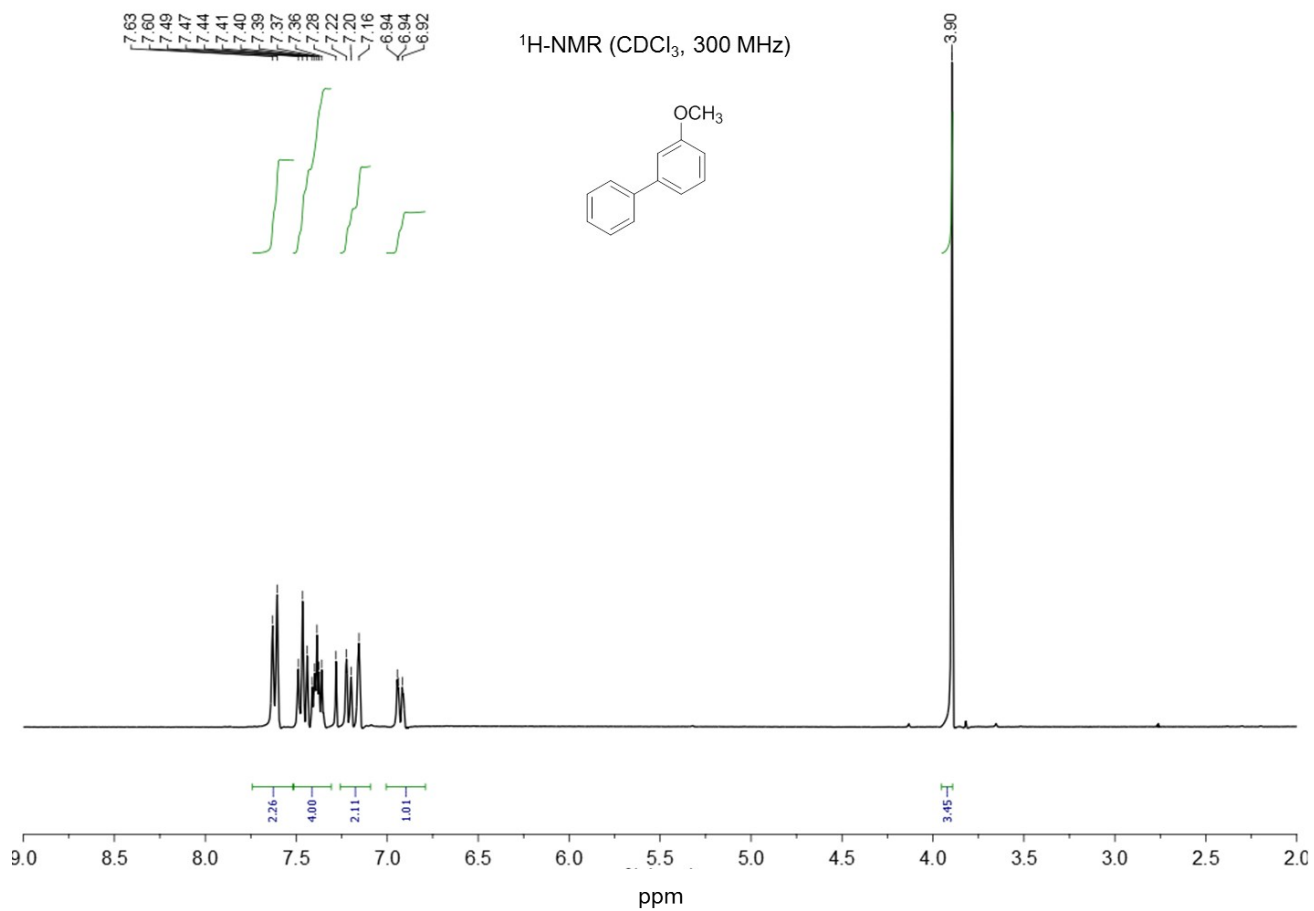



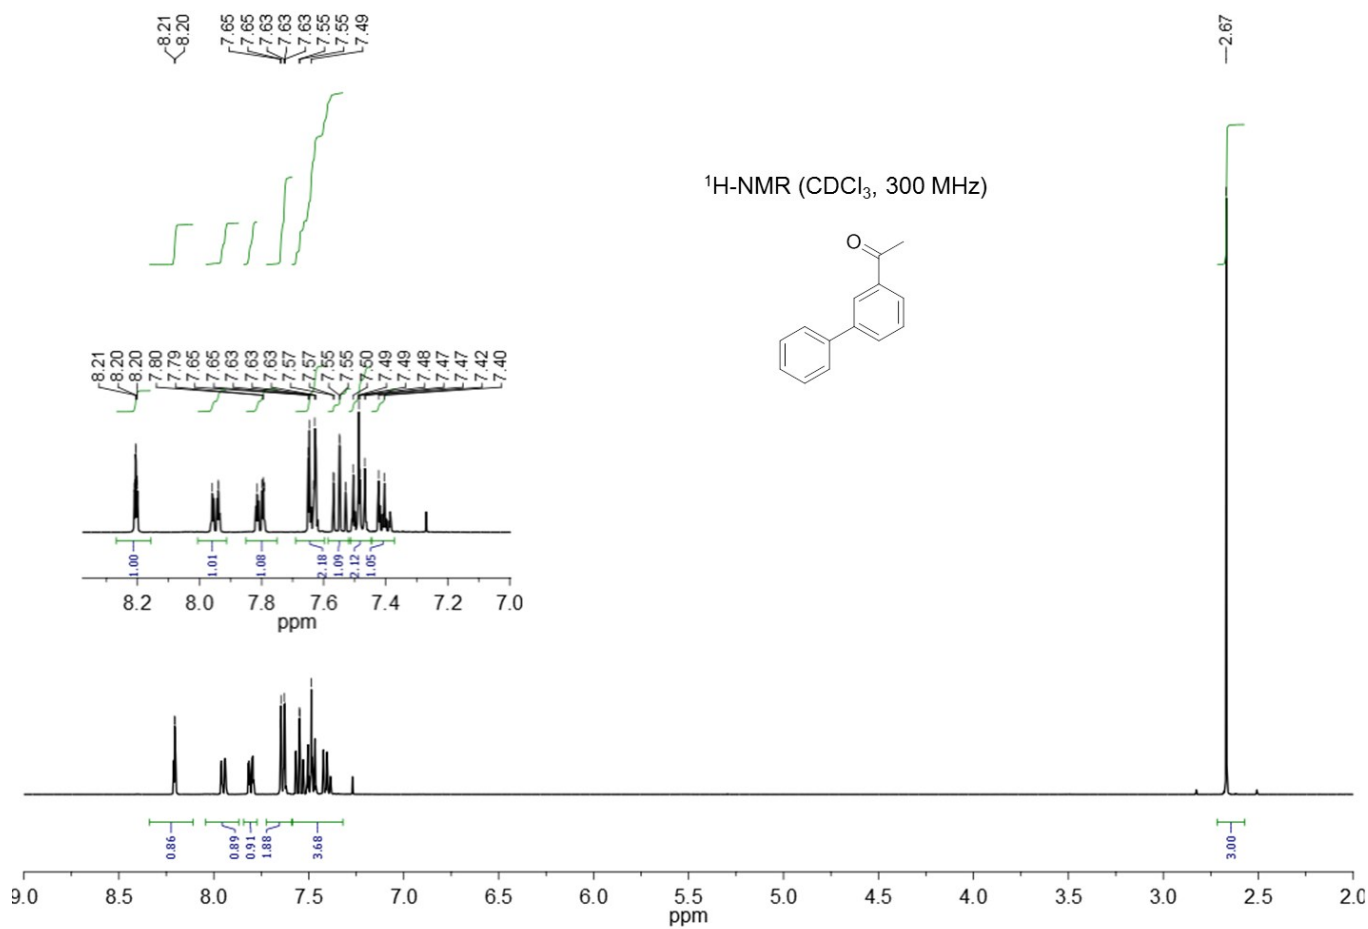

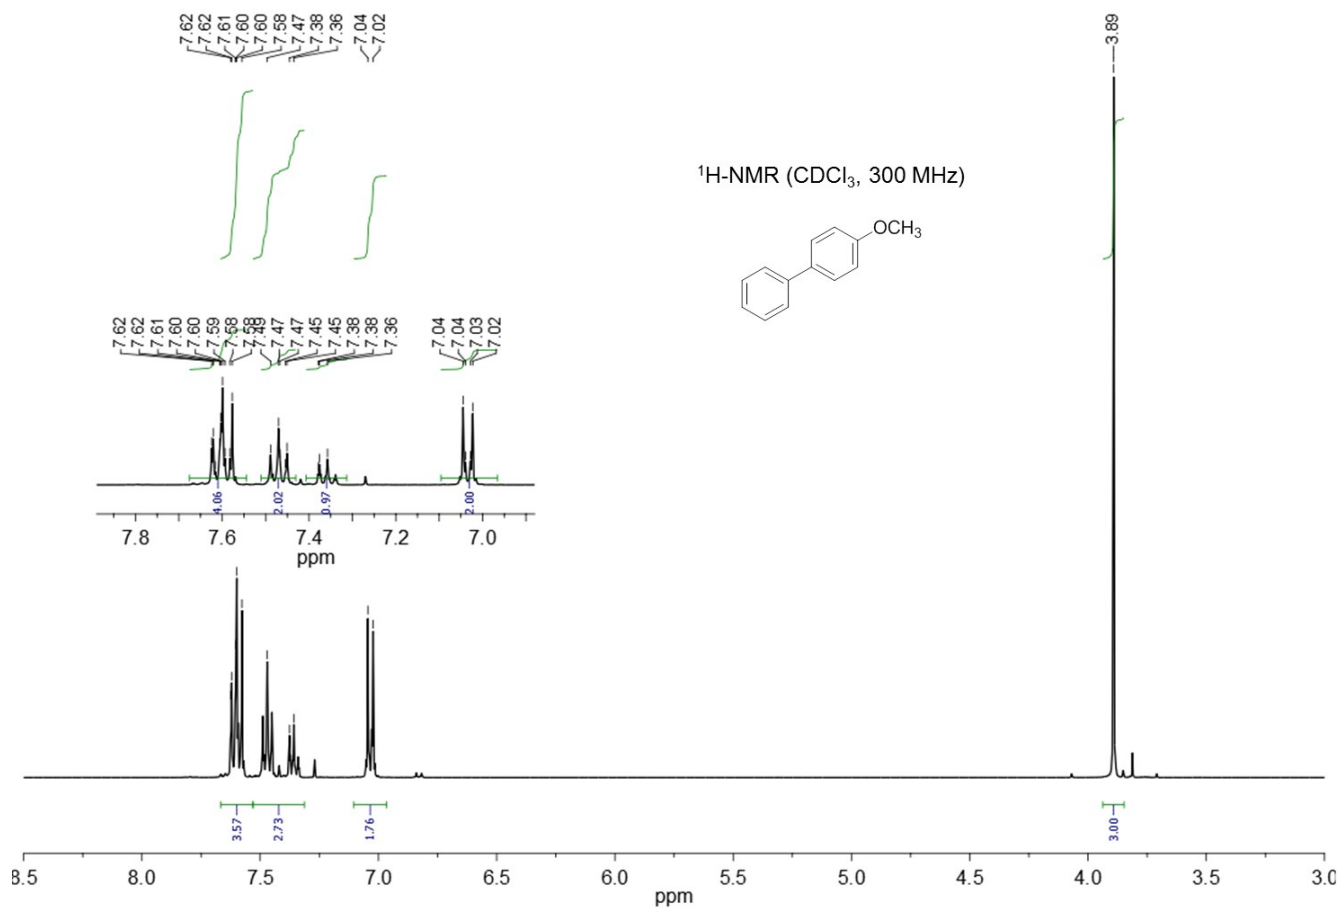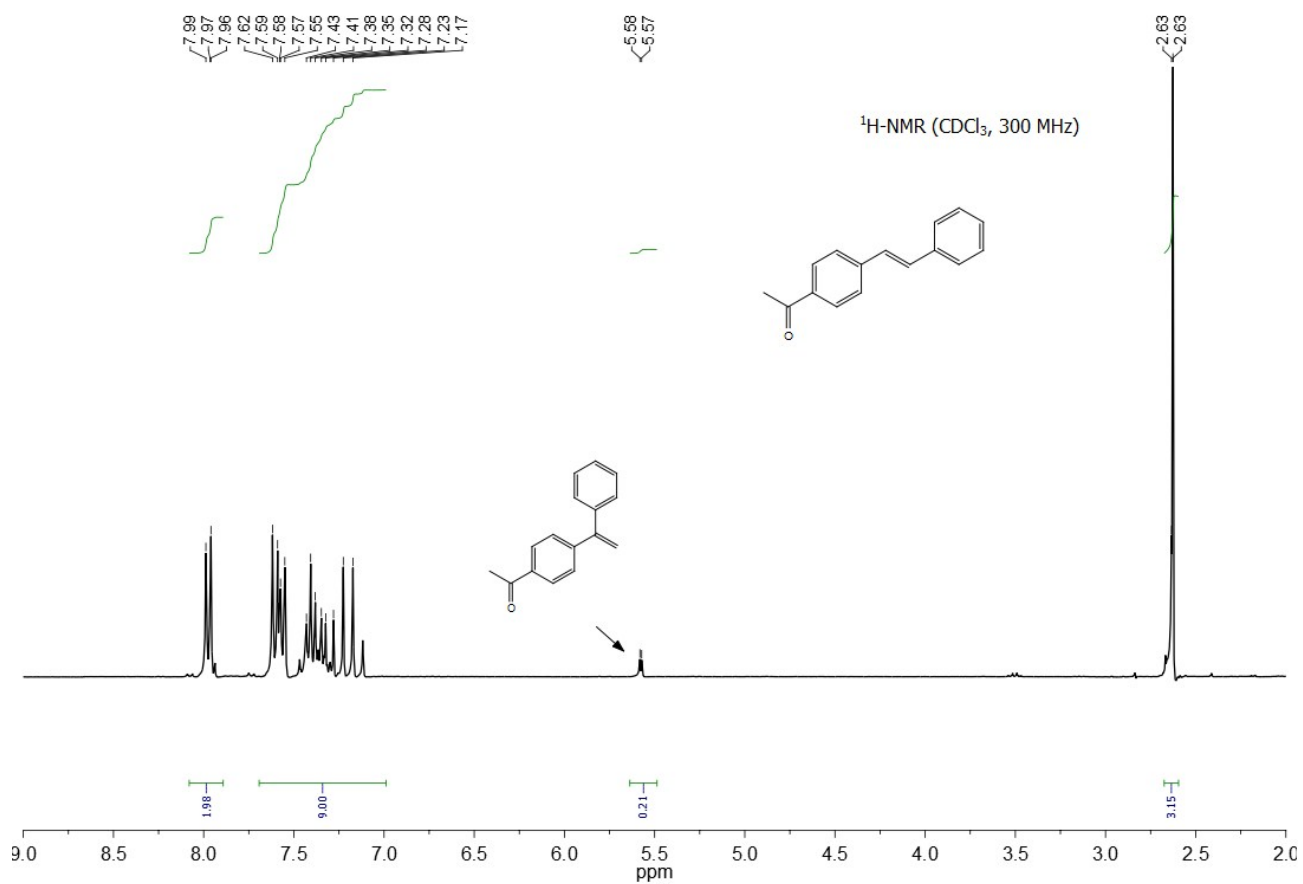

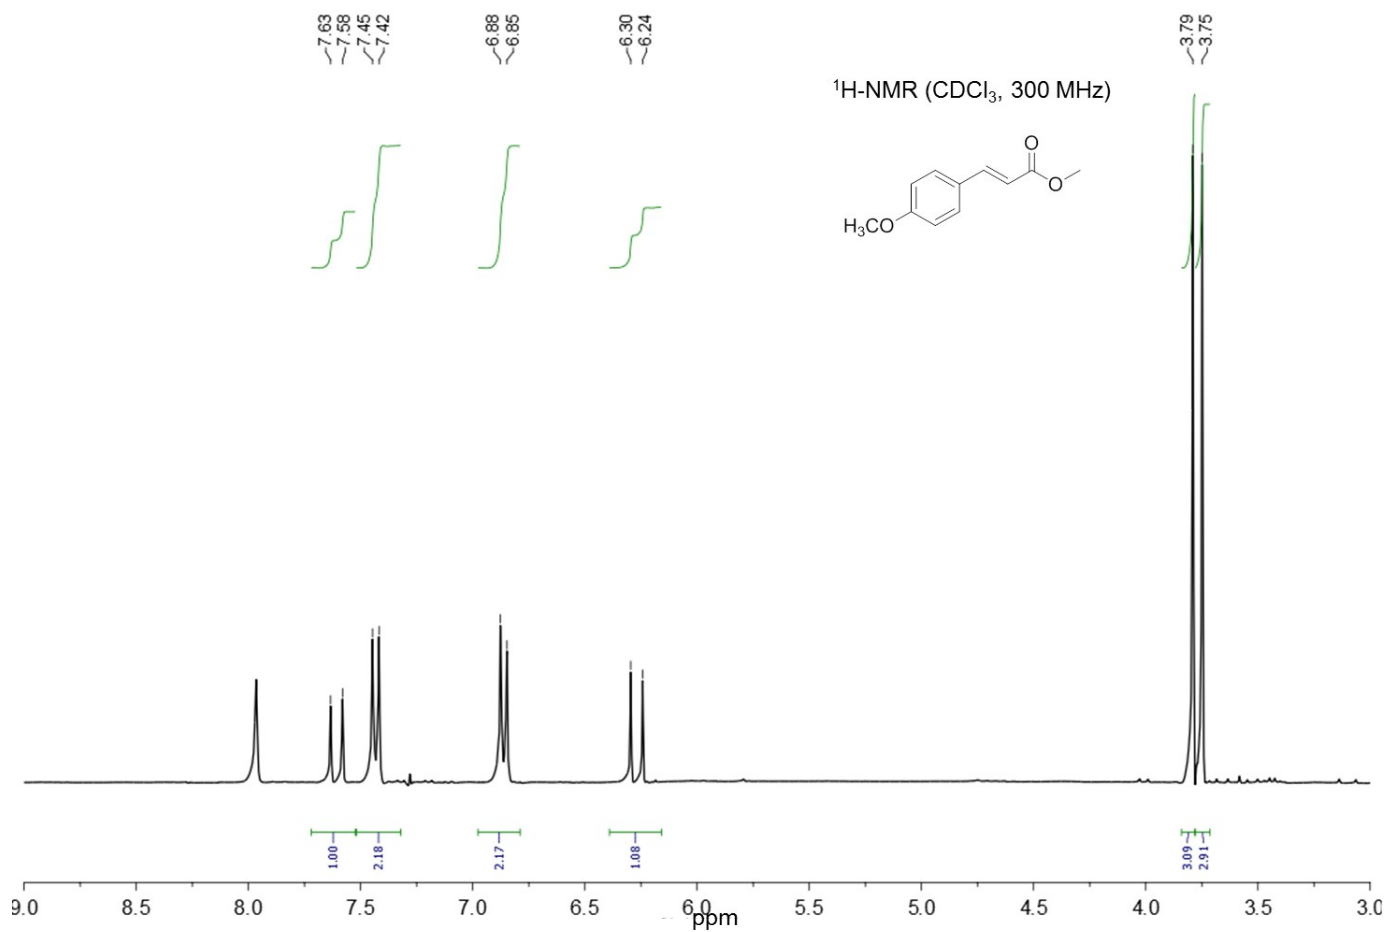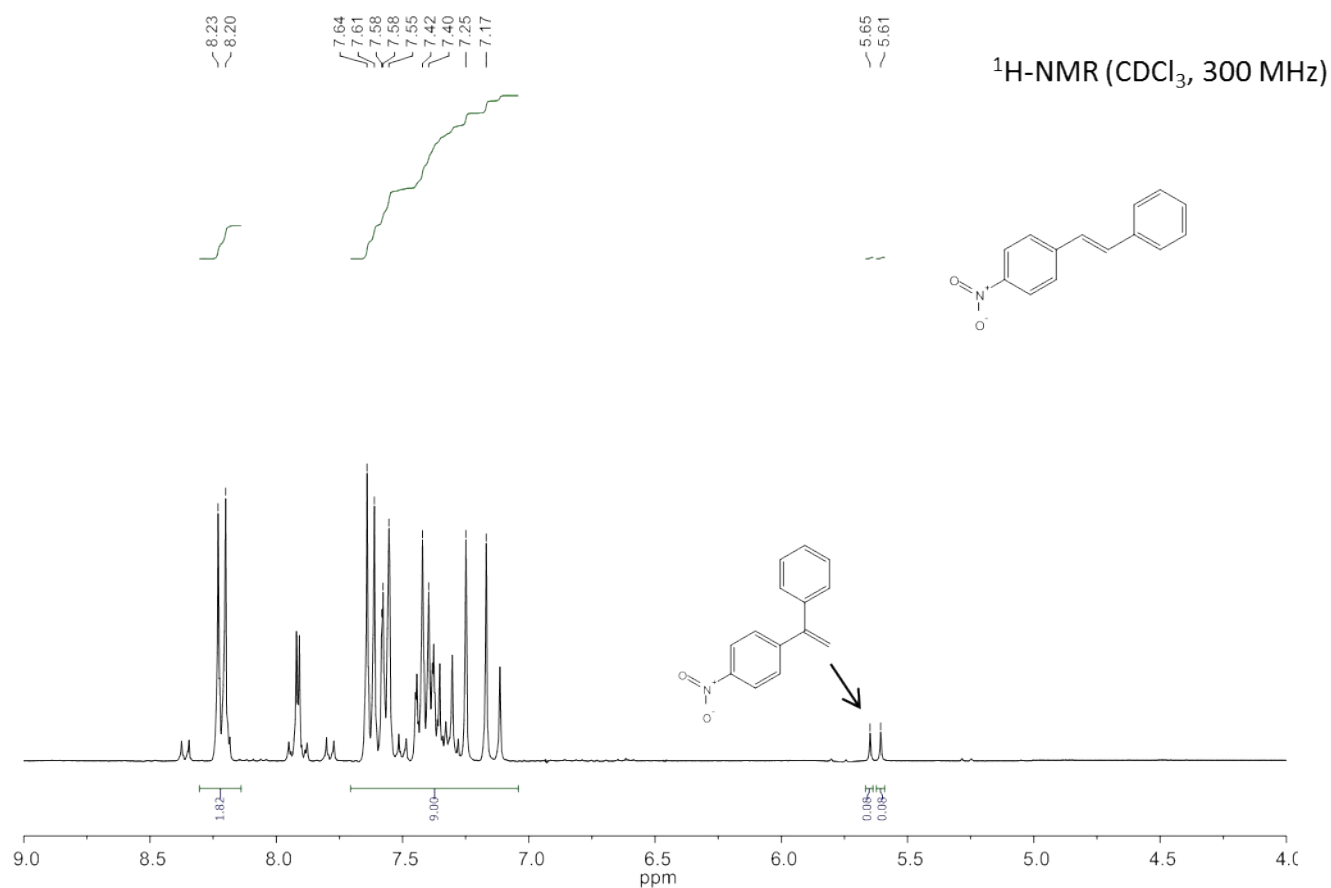

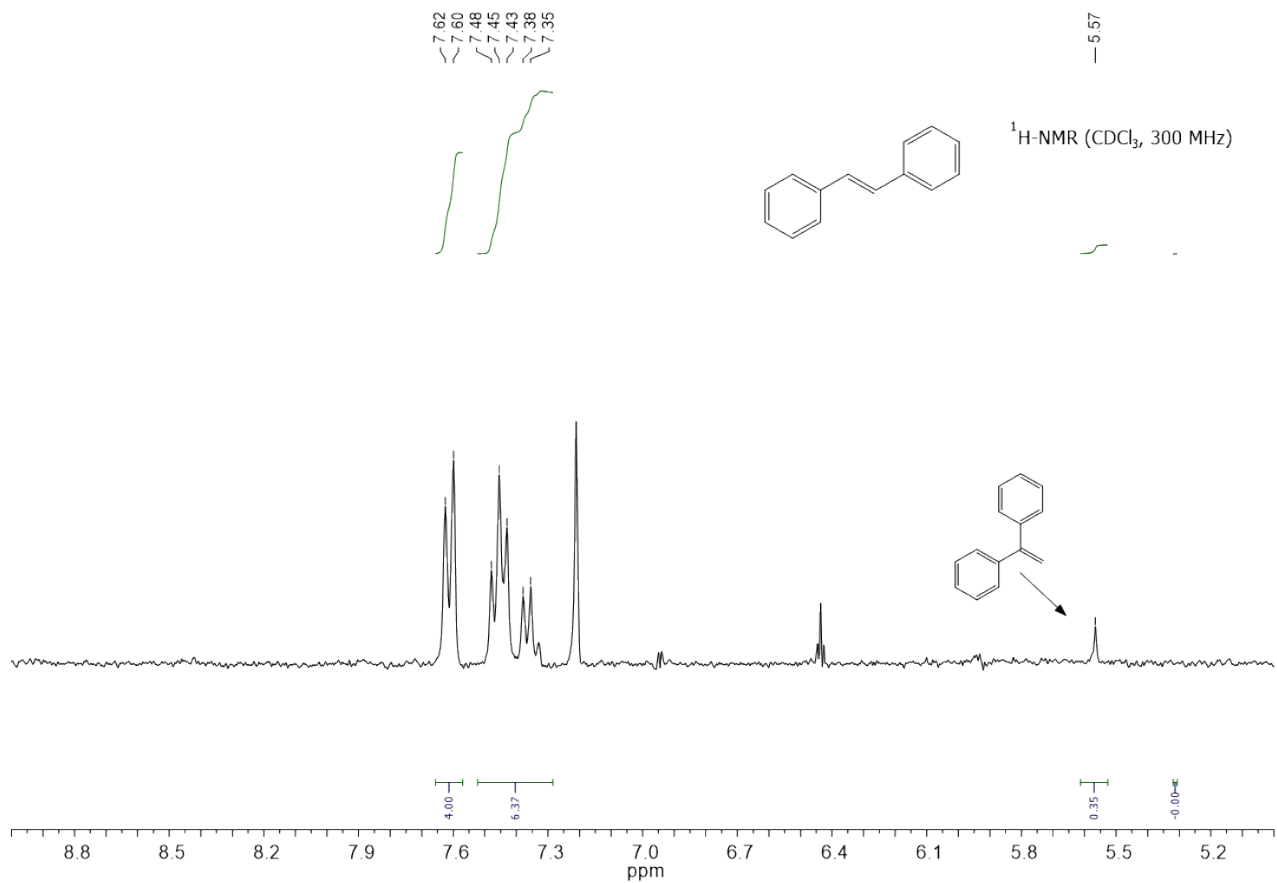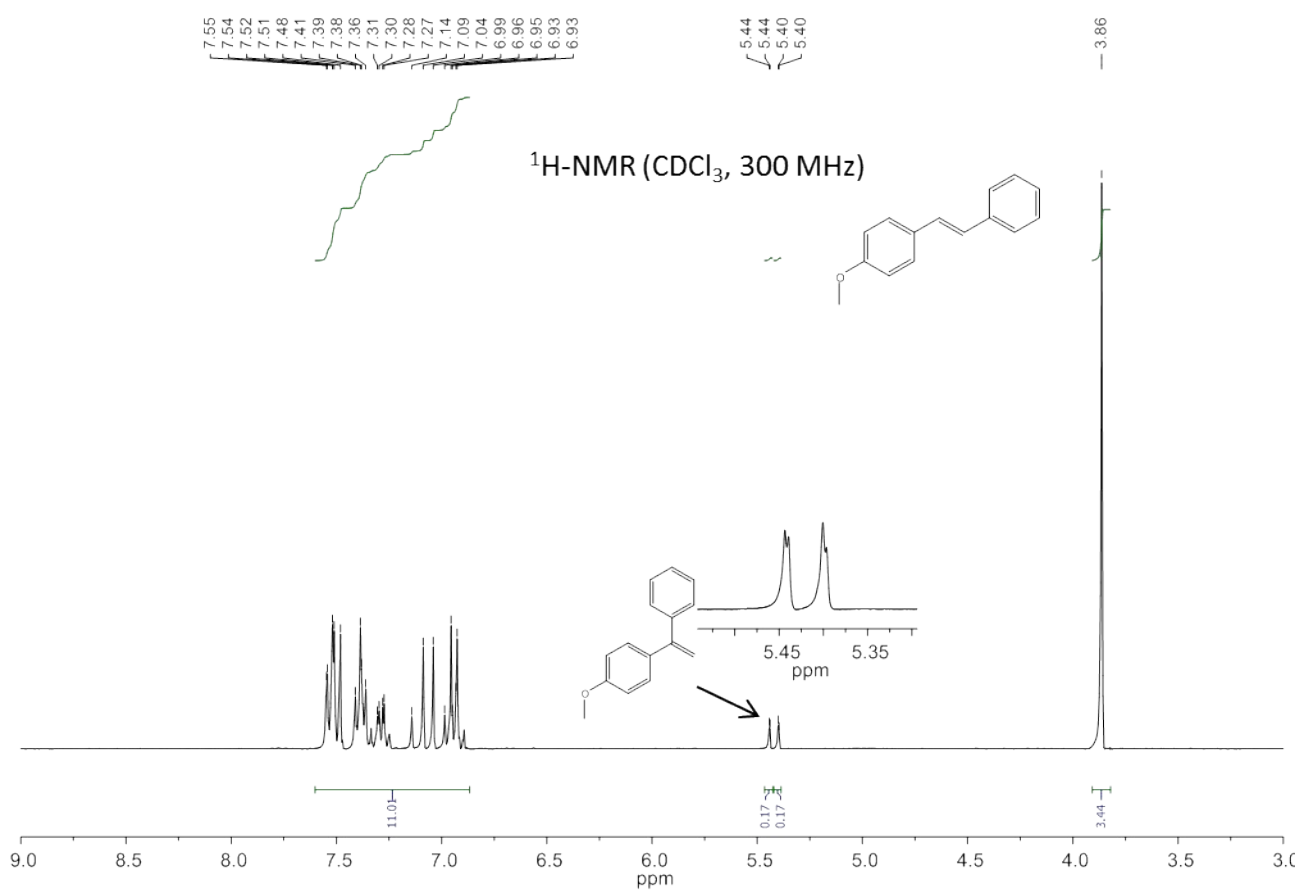

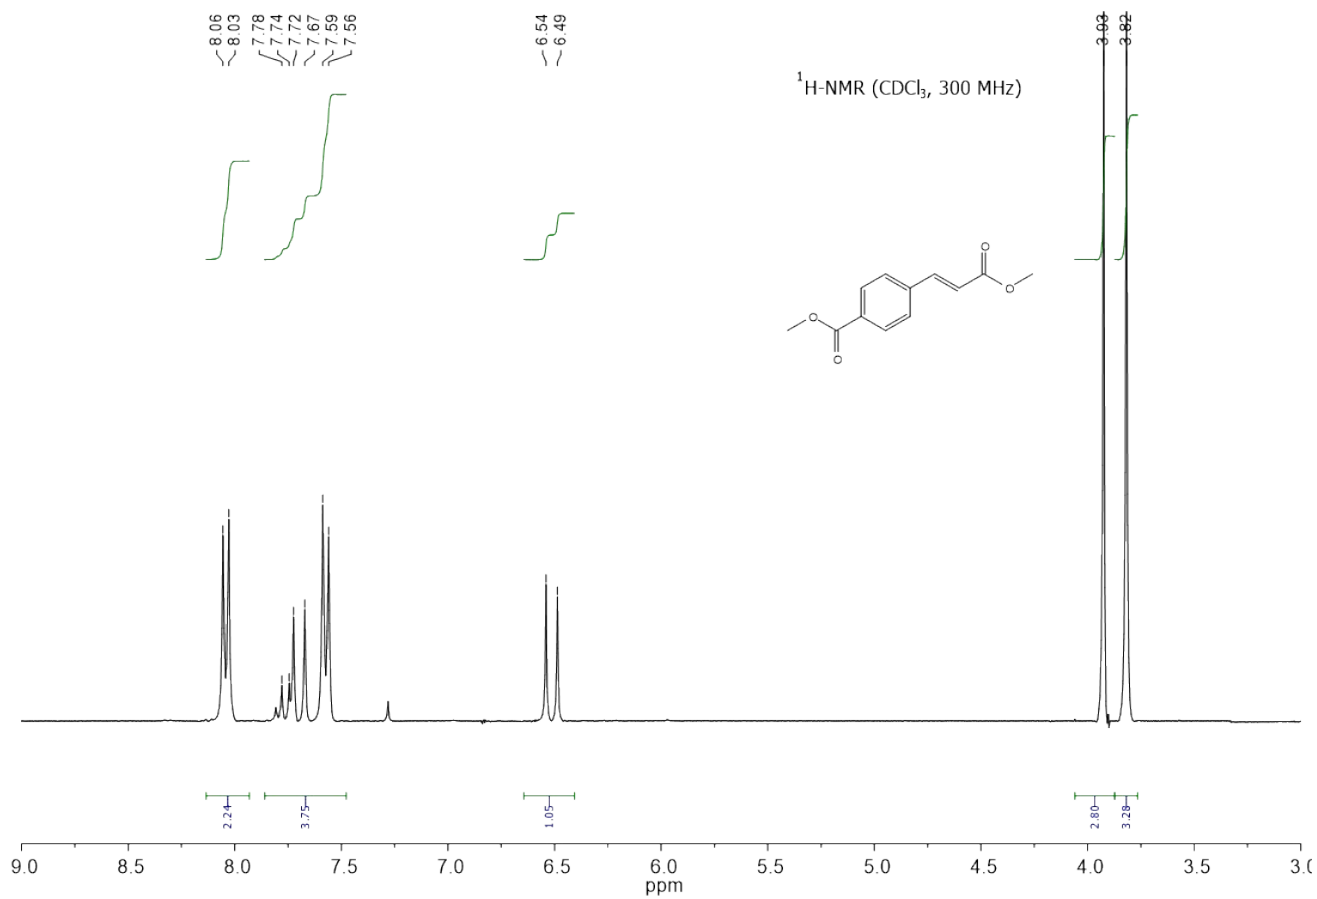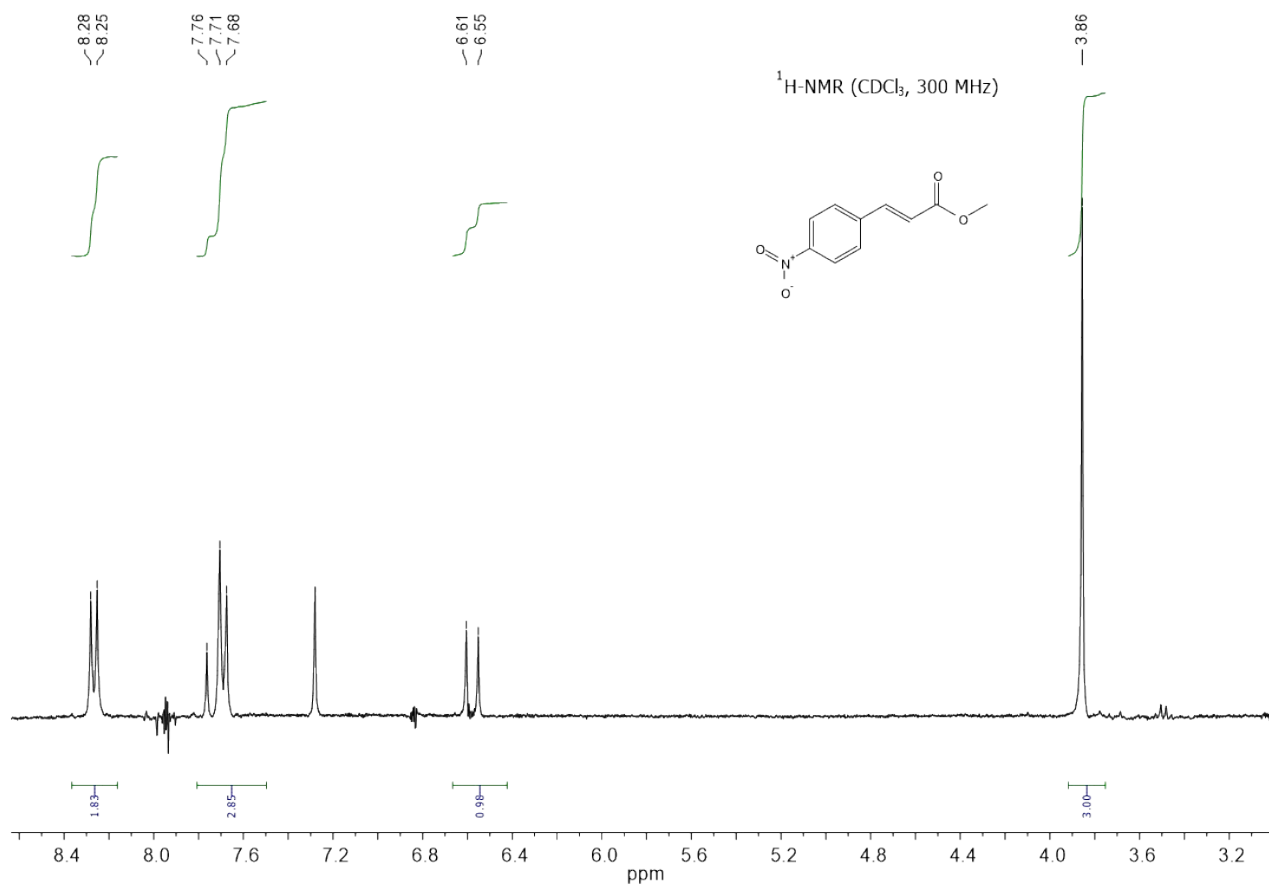

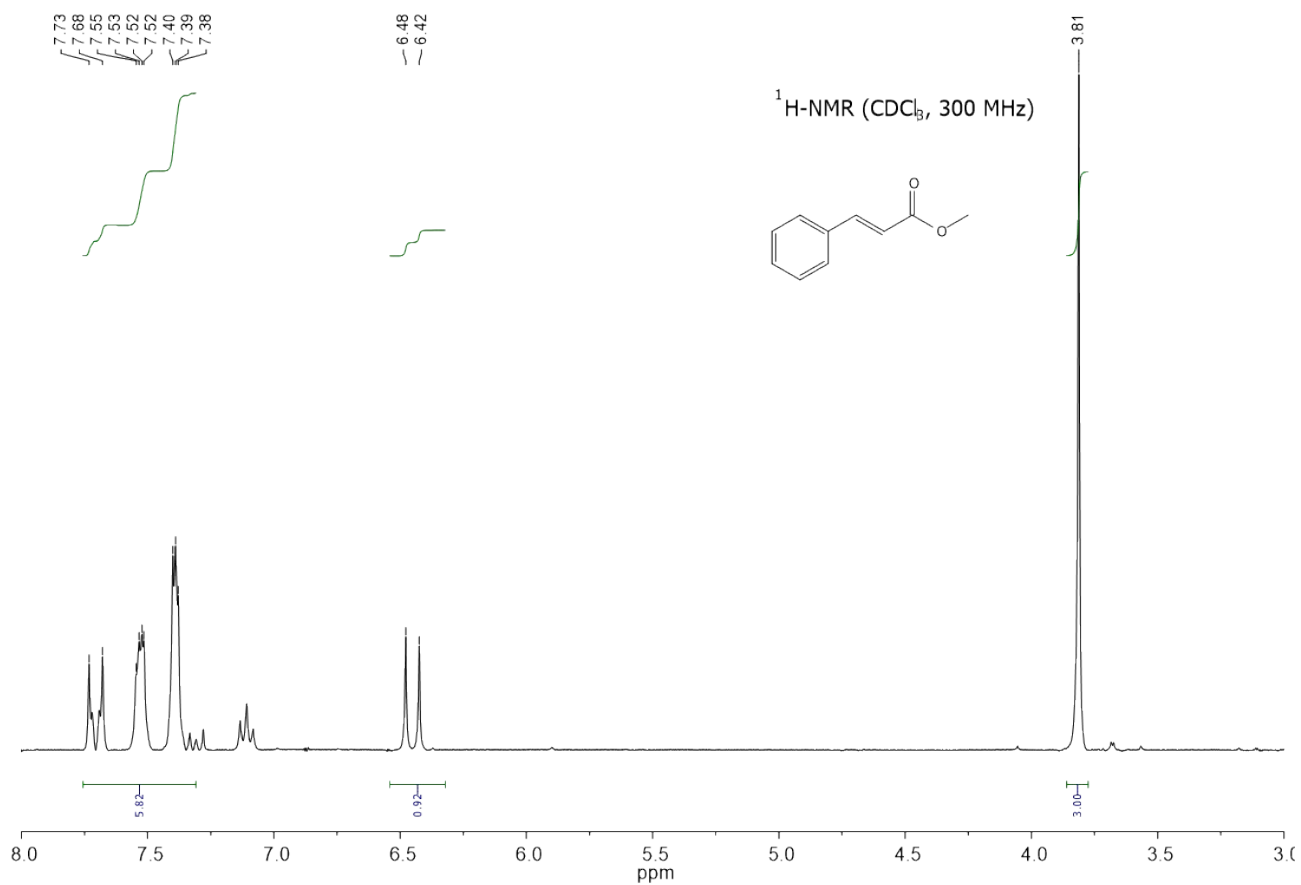

Supplement: c8nj02932f1.pdf [file c8nj02932f1.pdf]
